# Supplementary material
Source: HighWire-hosted journal article supplement (https://bmjopen.bmj.com/content/15/2/e086470)
Supplement: inline-supplementary-material-3 [file inline-supplementary-material-3.pdf]

### Supplementary File 3

#### Data analysis after excluding underweight children

Among the 1,967 children included in the study, there were 151 underweight cases, accounting for 7.7% of the total. After excluding underweight children from the “nonoverweight/nonobese” group, we conducted a statistical analysis again. The results are presented as follows.

The differences in children's overweight/obesity related to various family characteristics and caregivers' health behaviors were consistent with prior statistical findings (variables with  $P < 0.05$  in the original analysis stayed  $P < 0.05$  in the new analysis, and vice versa.) (Table S1 and Table S2).

Logistic regression analysis (Table S3) showed that, except for the change in the  $P$ -value of the correlation between caregiver exercise frequency and children's overweight/obesity, all other conclusions remained consistent with previous statistics. The original analysis indicated that children with caregivers exercising  $\geq 3$  times/week were less likely to be overweight and obese compared to those whose caregivers exercised  $< 1$  time/week ( $P = 0.045$ ,  $OR = 0.643$ , 95% CI: 0.417-0.990). In the new analysis, the  $P$ -value increased to 0.077 ( $OR = 0.674$ , 95% CI: 0.436-1.043). While this does not reach statistical significance at the 0.05 level, it still reflects a trend close to significance. Moreover, statistics indicated that among caregivers exercising  $\geq 3$  times/week, the proportions of their children who were overweight and obese, normal-weight, and underweight were 10.2%, 15.6%, and 21.2%, respectively. Notably, a higher proportion was found in the underweight group, supporting our conclusion that increased caregiver exercise frequency serves as a protective factor against childhood overweight and obesity. Therefore, excluding underweight children also removed those with a higher proportion of caregivers exercising  $\geq 3$  times/week. Consequently, the  $P$ -value in the regression analysis increased. Aside from this change, there were no differences in other variables' statistical outcomes compared to before.

The prevalence of childhood obesity in China is escalating at an alarming rate. This study focused on children who are overweight and obese. Given the current high rates of childhood obesity and its long-term adverse effects, we prefer to support the protective role of higher caregiver exercise frequency against child overweight/obesity, as well as its potential

long-term benefits.

| Table S1 Demographic characteristics of participant |                   |                                          |                                      |                 |         |
|-----------------------------------------------------|-------------------|------------------------------------------|--------------------------------------|-----------------|---------|
| Variables                                           | Total<br>(n=1816) | Group                                    |                                      | Statistic       | P value |
|                                                     |                   | Nonoverweig<br>ht/nonobesity<br>(n=1533) | Overweight<br>and obesity<br>(n=283) |                 |         |
| Sex, n (%)                                          |                   |                                          |                                      | $\chi^2=0.511$  | 0.475   |
| Male                                                | 895 (49.3)        | 750(48.9)                                | 145 (51.2)                           |                 |         |
| Female                                              | 921(50.7)         | 783 (51.1)                               | 138 (48.8)                           |                 |         |
| Age group(years) , n (%)                            |                   |                                          |                                      | $Z=-7.935$      | <0.001  |
| 2-3                                                 | 447 (24.6)        | 415(27.1)                                | 32 (11.3)                            |                 |         |
| 3-4                                                 | 658 (36.2)        | 571(37.2)                                | 87 (30.7)                            |                 |         |
| 4-5                                                 | 402 (22.1)        | 322 (21.0)                               | 80 (28.3)                            |                 |         |
| 5-6                                                 | 309 (17.0)        | 225 (14.7)                               | 84 (29.7)                            |                 |         |
| Caregivers, n (%)                                   |                   |                                          |                                      | $\chi^2=0.760$  | 0.684   |
| Parents                                             | 1009 (55.6)       | 846 (55.2)                               | 163 (57.6)                           |                 |         |
| Grandparents                                        | 789(43.4)         | 671 (43.8)                               | 118 (41.7)                           |                 |         |
| Others                                              | 18 (1.0)          | 16(1.0)                                  | 2 (0.7)                              |                 |         |
| Annual family income(yuan) , n (%)                  |                   |                                          |                                      | $Z=-0.593$      | 0.553   |
| <100000                                             | 503 (27.7)        | 423 (27.6)                               | 80 (28.3)                            |                 |         |
| 100000~300000                                       | 1097 (60.4)       | 936 (61.1)                               | 161 (56.9)                           |                 |         |
| >300000                                             | 216 (11.9)        | 174 (11.4)                               | 42 (14.8)                            |                 |         |
| Father's nutritional status, n (%)                  |                   |                                          |                                      | $\chi^2=13.321$ | <0.001  |
| Nonoverweight/nonobesity                            | 736 (40.5)        | 649 (42.3)                               | 87 (30.7)                            |                 |         |
| Overweight and obesity                              | 1080 (59.5)       | 884(57.7)                                | 196 (69.3)                           |                 |         |
| Mother's nutritional status, n (%)                  |                   |                                          |                                      | $\chi^2=31.168$ | <0.001  |
| Nonoverweight/nonobesity                            | 1285 (70.8)       | 1124 (73.3)                              | 161 (56.9)                           |                 |         |
| Overweight and obesity                              | 531(29.2)         | 409 (26.7)                               | 122(43.1)                            |                 |         |
| Father's education level, n (%)                     |                   |                                          |                                      | $\chi^2=1.122$  | 0.289   |
| Below college degree                                | 1091 (60.1)       | 929 (60.6)                               | 162(57.2)                            |                 |         |
| College degree or above                             | 725(39.9)         | 604 (39.4)                               | 121 (42.8)                           |                 |         |
| Mother's education level, n (%)                     |                   |                                          |                                      | $\chi^2=0.119$  | 0.731   |
| Below college degree                                | 1018 (56.1)       | 862 (56.2)                               | 156 (55.1)                           |                 |         |
| College degree or above                             | 798 (43.9)        | 671 (43.8)                               | 127 (44.9)                           |                 |         |

| Table S2 Differences in overweight and obesity among children whose caregivers had different health-related behaviours |                |                                 |                                |                        |         |
|------------------------------------------------------------------------------------------------------------------------|----------------|---------------------------------|--------------------------------|------------------------|---------|
| Health-related behaviours of caregivers                                                                                | Total (n=1816) | Group                           |                                | Statistic              | P value |
|                                                                                                                        |                | Nonoverweight/nobesity (n=1533) | Overweight and obesity (n=283) |                        |         |
| Frequency of exercise, n (%)                                                                                           |                |                                 |                                | Z=-3.288               | 0.001   |
| <1 time/week                                                                                                           | 1045 (57.5)    | 858 (56.0)                      | 187 (66.1)                     |                        |         |
| 1-2 times/week                                                                                                         | 503 (27.7)     | 436 (28.4)                      | 67 (23.7)                      |                        |         |
| ≥3 times/week                                                                                                          | 268 (14.8)     | 239 (15.6)                      | 29 (10.2)                      |                        |         |
| Duration of each exercise session, n (%)                                                                               |                |                                 |                                | Z=-0.483               | 0.629   |
| <30 minutes                                                                                                            | 1027 (56.6)    | 864(56.4)                       | 163(57.6)                      |                        |         |
| 30-60 minutes                                                                                                          | 473 (26.0)     | 399(26.0)                       | 74(26.1)                       |                        |         |
| ≥60 minutes                                                                                                            | 316 (17.4)     | 270(17.6)                       | 46(16.3)                       |                        |         |
| Usually encourages children to exercise, n (%)                                                                         |                |                                 |                                | χ <sup>2</sup> =14.769 | <0.001  |
| No                                                                                                                     | 181 (10.0)     | 135(8.8)                        | 46(16.3)                       |                        |         |
| Yes                                                                                                                    | 1635 (90.0)    | 1398(91.2)                      | 237(83.7)                      |                        |         |
| Frequency of eating desserts, n (%)                                                                                    |                |                                 |                                | Z=-4.110               | <0.001  |
| ≤1 time/week                                                                                                           | 1206 (66.4)    | 1047(68.3)                      | 159(56.2)                      |                        |         |
| 2-3 times/week                                                                                                         | 446 (24.6)     | 360(23.5)                       | 86(30.4)                       |                        |         |
| ≥4 times/week                                                                                                          | 164 (9.0)      | 126(8.2)                        | 38(13.4)                       |                        |         |
| Frequency of eating late-night snacks, n (%)                                                                           |                |                                 |                                | Z=-0.790               | 0.430   |
| ≤1 time/week                                                                                                           | 1657 (91.2)    | 1402(91.5)                      | 255(90.1)                      |                        |         |
| 2-3 times/week                                                                                                         | 123 (6.8)      | 104(6.8)                        | 19(6.7)                        |                        |         |
| ≥4 times/week                                                                                                          | 36 (2.0)       | 27(1.8)                         | 9(3.2)                         |                        |         |
| Frequency of eating fast food, n (%)                                                                                   |                |                                 |                                | Z=-2.959               | 0.003   |
| ≤1 time/week                                                                                                           | 1532 (84.4)    | 1309(85.4)                      | 223(78.8)                      |                        |         |
| 2-3 times/week                                                                                                         | 203 (11.2)     | 166(10.8)                       | 37(13.1)                       |                        |         |
| ≥4 times/week                                                                                                          | 81 (4.5)       | 58(3.8)                         | 23(8.1)                        |                        |         |
| Usually eats regularly, n (%)                                                                                          |                |                                 |                                | χ <sup>2</sup> =6.196  | 0.013   |
| Yes                                                                                                                    | 1539 (84.7)    | 1313 (85.6)                     | 226(79.9)                      |                        |         |
| No                                                                                                                     | 277 (15.3)     | 220(14.4)                       | 57(20.1)                       |                        |         |
| Proportion of meat and vegetables in diet, n (%)                                                                       |                |                                 |                                | Z=-0.572               | 0.567   |
| Vegetables > meat                                                                                                      | 1409 (77.6)    | 1193(77.8)                      | 216(76.3)                      |                        |         |
| Vegetables = meat                                                                                                      | 107 (5.9)      | 90(5.9)                         | 17(6.0)                        |                        |         |
| Vegetables < meat                                                                                                      | 300 (16.5)     | 250(16.3)                       | 50(17.7)                       |                        |         |

| Table S3 Logistic regression analysis of caregivers' health-related behaviors and the prevalence of overweight and obesity in children |         |                |        |          |                     |                |
|----------------------------------------------------------------------------------------------------------------------------------------|---------|----------------|--------|----------|---------------------|----------------|
| Health-related behaviors                                                                                                               |         |                |        |          |                     |                |
| of caregivers                                                                                                                          | $\beta$ | s <sub>x</sub> | Wald   | $\chi^2$ | OR(95% CI)          | <i>P</i> value |
| Frequency of exercise                                                                                                                  |         |                |        |          |                     |                |
| <1 time/week                                                                                                                           |         |                |        |          | 1.000               |                |
| 1-2 times/week                                                                                                                         | -0.276  | 0.161          | 2.929  |          | 0.759 (0.553-1.041) | 0.087          |
| ≥3 times/week                                                                                                                          | -0.394  | 0.222          | 3.137  |          | 0.674 (0.436-1.043) | 0.077          |
| Usually encourages children to exercise                                                                                                |         |                |        |          |                     |                |
| No                                                                                                                                     |         |                |        |          | 1.000               |                |
| Yes                                                                                                                                    | -0.685  | 0.197          | 12.125 |          | 0.504 (0.343-0.741) | <0.001         |
| Frequency of eating desserts                                                                                                           |         |                |        |          |                     |                |
| ≤1 time/week                                                                                                                           |         |                |        |          | 1.000               |                |
| 2-3 times/week                                                                                                                         | 0.428   | 0.156          | 7.515  |          | 1.535 (1.130-2.085) | 0.006          |
| ≥4 times/week                                                                                                                          | 0.610   | 0.217          | 7.893  |          | 1.840 (1.203-2.816) | 0.005          |
| Frequency of eating fast food                                                                                                          |         |                |        |          |                     |                |
| ≤1 time/week                                                                                                                           |         |                |        |          | 1.000               |                |
| 2-3 times/week                                                                                                                         | 0.297   | 0.208          | 2.040  |          | 1.346 (0.895-2.025) | 0.153          |
| ≥4 times/week                                                                                                                          | 0.850   | 0.275          | 9.522  |          | 2.339 (1.363-4.011) | 0.002          |
| Usually eats regularly                                                                                                                 |         |                |        |          |                     |                |
| Yes                                                                                                                                    |         |                |        |          | 1.000               |                |
| No                                                                                                                                     | 0.415   | 0.175          | 5.615  |          | 1.515 (1.074-2.136) | 0.018          |
